# Supplementary material for: Discovery of Novel Circulating Immune Complexes in Lupus Nephritis Using Immunoproteomics
Source: PubMed Central journal article supplement (PMC8996714; doi:10.3389/fimmu.2022.850015), 2022-03-24
Supplement: DataSheet_1.pdf [file DataSheet_1.pdf]

**Supplementary Table 1. The 52 serum autoantigens detected only in LN patients through Protein A/G based immune complex capture and mass spectrometry**

| <b>Accession</b> | <b>Gene</b> | <b>MW [kDa]</b> | <b>PSMs</b> | <b>Cumulative protein score</b> | <b>calc. pI</b> |
|------------------|-------------|-----------------|-------------|---------------------------------|-----------------|
| Q6N089           | IGHV3-15    | 51.69           | 134         | 364.61                          | 7.93            |
| Q15323           | KRT31       | 47.21           | 70          | 144.41                          | 4.88            |
| P78385           | KRT83       | 54.16           | 71          | 121.71                          | 5.64            |
| O76009           | KRT33A      | 45.91           | 52          | 104.15                          | 4.82            |
| C4AMA3           | KRT34       | 44.69           | 42          | 82.42                           | 4.78            |
| O76013           | KRT36       | 52.21           | 36          | 71.34                           | 4.94            |
| P78386           | KRT85       | 55.77           | 46          | 62.31                           | 6.55            |
| Q701L7           | KRT82       | 56.61           | 23          | 46.60                           | 6.74            |
| Q0ZCI9           | IGHV3-33    | 14.13           | 9           | 22.66                           | 7.94            |
| P02533           | KRT14       | 51.53           | 13          | 22.14                           | 5.16            |
| A2NB45           | IGKV2-28    | 12.38           | 12          | 20.53                           | 8.48            |
| Q9UL84           | IGHV3-30    | 13.57           | 7           | 18.11                           | 8.46            |
| Q65ZC9           | SCFV        | 25.55           | 8           | 15.94                           | 9.11            |
| P04433           | IGKV3D-11   | 12.57           | 11          | 15.51                           | 4.96            |
| A2J1M2           | IGHV1-69    | 10.54           | 8           | 14.64                           | 9.17            |
| A8K5T0           | CFH         | 138.86          | 7           | 12.17                           | 6.71            |
| A8MTN3           | KRTAP2-2    | 12.95           | 3           | 7.43                            | 7.81            |
| A2KLM6           | IGHV5-51    | 10.54           | 3           | 7.43                            | 7.24            |
| A6XMH1           | TTR         | 14.95           | 2           | 4.21                            | 5.76            |
| A2NXP8           | IGHV3-64    | 13.82           | 2           | 4.12                            | 9.72            |
| C9JEX1           | KNG1        | 43.79           | 2           | 4.09                            | 6.43            |
| Q9Y4D8           | HECTD4      | 439.07          | 2           | 4.08                            | 6.19            |
| E2QRI1           | P3H1        | 23.07           | 1           | 3.76                            | 5.44            |
| B4DED3           | SALL2       | 88.91           | 1           | 3.71                            | 6.51            |
| Q16820           | MEP1B       | 79.52           | 1           | 3.69                            | 5.74            |
| Q5NV88           | IGLV6-57    | 10.64           | 3           | 3.58                            | 4.78            |
| Q8IZ21           | PHACTR4     | 78.16           | 1           | 3.52                            | 6.62            |
| Q8N8W4           | PNPLA1      | 57.84           | 1           | 2.94                            | 8.07            |
| B4E0F7           | C1orf131    | 26.66           | 1           | 2.86                            | 9.33            |
| E5RH57           | LRP12       | 15.51           | 1           | 2.83                            | 6.28            |
| O95154           | AKR7A3      | 37.18           | 1           | 2.80                            | 7.15            |
| D5KJA2           | DHRS4L2     | 15.17           | 1           | 2.74                            | 7.96            |
| Q5VTB9           | RNF220      | 62.73           | 1           | 2.73                            | 6.04            |
| D6RFL4           | CD14        | 23.30           | 1           | 2.64                            | 5.26            |
| E7EMN9           | RGS12       | 61.05           | 1           | 2.48                            | 9.11            |
| B3KRB1           | CYRIA       | 20.47           | 1           | 2.23                            | 7.78            |

|        |          |        |   |      |       |
|--------|----------|--------|---|------|-------|
| A2NYU8 | IGHV4-59 | 12.67  | 1 | 2.19 | 9.20  |
| C9JWQ3 | PLXDC1   | 25.30  | 1 | 2.10 | 6.60  |
| P01775 | IGHV3-23 | 12.85  | 1 | 2.03 | 8.48  |
| Q3MI95 | FOXD4    | 43.07  | 1 | 2.02 | 9.42  |
| C9JDC7 | DZIP1    | 30.47  | 1 | 2.01 | 8.46  |
| Q14993 | COL19A1  | 115.15 | 1 | 1.90 | 8.32  |
| Q96IN2 | GUK1     | 20.32  | 1 | 1.88 | 6.21  |
| Q5NV79 | IGLV4-60 | 10.67  | 1 | 1.86 | 5.81  |
| Q587J0 | POLR2D   | 6.63   | 1 | 1.82 | 4.83  |
| A8K9J7 | H2BC5    | 13.99  | 2 | 1.70 | 10.32 |
| A2NB43 | IGHV4-34 | 13.04  | 2 | 1.70 | 9.41  |
| E5RG74 | ADGRB1   | 126.61 | 2 | 1.64 | 7.90  |
| Q66GS9 | CEP135   | 133.41 | 1 | 1.64 | 6.21  |
| D7F7N5 | MEF2C    | 44.91  | 1 | 1.63 | 9.22  |
| A8MVY7 | KMT2B    | 288.16 | 1 | 1.61 | 8.24  |
| Q5JSL3 | DOCK11   | 237.52 | 1 | 1.61 | 7.74  |

---

**Supplementary Table 2. The 27 serum autoantigens detected only in LN patients through C1Q based immune complex capture and mass spectrometry.**

| Accession | Gene     | MW [kDa] | PSMs | Cumulative protein score | calc. pI |
|-----------|----------|----------|------|--------------------------|----------|
| A8K9P0    | ALB      | 69.22    | 60   | 99.50                    | 6.28     |
| Q96KK5    | H2AC12   | 13.90    | 23   | 76.76                    | 10.89    |
| B4E1T1    | KRT5     | 58.81    | 19   | 32.70                    | 5.97     |
| P01857    | IGHG1    | 36.08    | 15   | 27.80                    | 8.19     |
| P02533    | KRT14    | 51.53    | 14   | 23.72                    | 5.16     |
| P01834    | IGKC     | 11.60    | 9    | 23.55                    | 5.87     |
| Q8TCE1    | SERPINC1 | 29.07    | 8    | 17.39                    | 8.81     |
| A8MST3    | SOD1     | 13.90    | 3    | 10.25                    | 6.11     |
| Q96C32    | UBC      | 34.28    | 4    | 8.89                     | 7.53     |
| E7EU73    | C3       | 122.51   | 3    | 8.44                     | 6.76     |
| P02652    | APOA2    | 11.17    | 4    | 7.75                     | 6.62     |
| P01859    | IGHG2    | 35.88    | 5    | 7.53                     | 7.59     |
| P01040    | CSTA     | 11.00    | 2    | 7.21                     | 5.50     |
| B7ZLF0    | FN1      | 239.47   | 3    | 4.53                     | 5.88     |
| P81605    | DCD      | 11.28    | 2    | 4.40                     | 6.54     |
| C9JRH1    | DHRX     | 13.68    | 1    | 4.06                     | 9.28     |
| Q14X33    | ND2      | 14.77    | 1    | 3.80                     | 9.88     |
| C9JSR0    | SULT1C2  | 14.62    | 2    | 3.41                     | 6.29     |
| B4DG27    | CD34     | 27.04    | 1    | 3.31                     | 7.64     |
| E9PFC2    | FAM178B  | 72.80    | 1    | 2.85                     | 5.43     |
| Q9NUZ1    | ACOXL    | 61.76    | 2    | 2.74                     | 8.53     |
| A6XMH1    | TTR      | 14.95    | 1    | 2.63                     | 5.76     |
| Q5TBM3    | HSPH1    | 13.17    | 1    | 2.43                     | 5.07     |
| Q1XII0    | BST1     | 29.31    | 1    | 2.31                     | 6.77     |
| B4E160    | NECAP1   | 15.13    | 1    | 2.21                     | 6.73     |
| B7ZM70    | TNN      | 124.32   | 1    | 1.89                     | 5.78     |
| B3KNT0    | PPP1R9B  | 35.11    | 1    | 1.67                     | 4.88     |

MW [kDa], molecular weight of the target protein; PSMs, the total number of identified peptide sequences (peptide spectrum matches) for the protein, including those redundantly identified; Cumulative protein score, the sum of the scores of the individual peptides for identified protein in LN patient. calc. pI, the theoretically calculated isoelectric point.

**Supplementary Table 3. Six SLE/LN genomic databases used in this study.**

|   | Database                          | Technology           | Platform                                        | # Patient | # Health | # DEGs | Accession Number | Database Name |
|---|-----------------------------------|----------------------|-------------------------------------------------|-----------|----------|--------|------------------|---------------|
| 1 | Der_2019 <sup>[1]</sup><br>Nehar- | scRNA-Seq            | Fluidigm C1 HT + Illumina NextSeq500            | 21        | 3        | 4432   | SDY997           | ImmPort       |
| 2 | Belaid_2020 <sup>[2]</sup>        | scRNA-Seq            | 10X Genomics + Illumina HiSeq 4000              | 8         | 5        | 8406   | phs002048.v1.p1  | dbGaP         |
| 3 | Yao_2020 <sup>[3]</sup>           | RNA-Seq              | Illumina HiSeq 2500                             | 3         | 3        | 2247   | GSE157293        | GEO           |
| 4 | Buang_2021 <sup>[4]</sup>         | RNA-Seq              | Illumina HiSeq 2500                             | 34        | 14       | 2312   | GSE97264         | GEO           |
| 5 | Zhu_2016 <sup>[5]</sup>           | Expression-<br>Array | Illumina HumanHT-12 V4.0 expression<br>beadchip | 15        | 25       | 1638   | GSE81622         | GEO           |
| 6 | Berthier_2012 <sup>[6]</sup>      | Expression-<br>Array | Affy_HGU133A_CDF_ENTREZG_10                     | 32        | 15       | 5823   | GSE32591         | GEO           |

Note: Sample type used in each study: 1. Kidney, 2. PBMC, 3. Kidney, 4. CD8+ T cells, 5. PBMC and 6. Kidney.

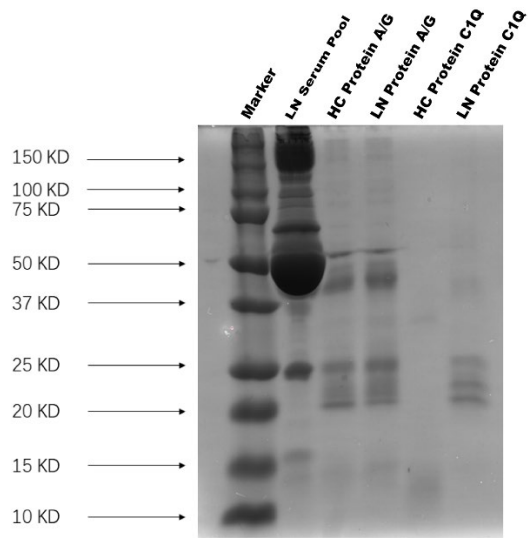

**Supplementary Figure 1.** SDS-PAGE analysis of the immuno-captured proteins/immune complex from serum samples of lupus patients or healthy controls using Protein A/G or C1q immunoprecipitation. Pooled serum samples from lupus patients (N=3) or healthy controls (N=3) were used in each immunoprecipitation experiment.

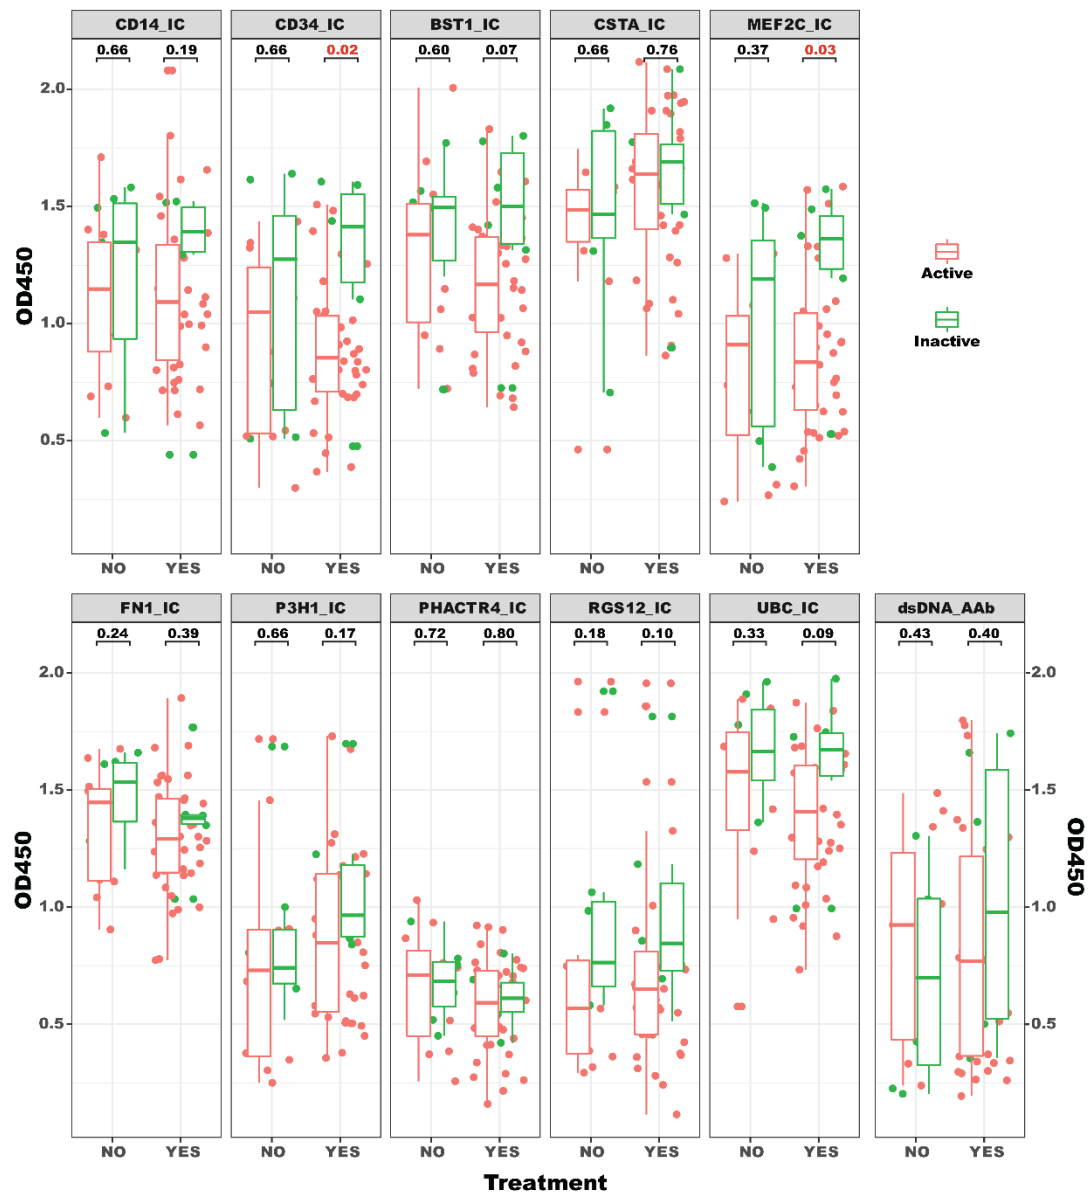

**Supplementary Figure 2.** Drug treatment response of immune complex or anti-dsDNA antibody. The LN patients treated with at least one of drugs (Pred, MMF and HCQ) were classed as drug treatment group (YES), otherwise they were classed as no-treatment group (NO). The difference between LN-Active and LN-Inactive were analyzed using Wilcoxon test, and the p values were indicated accordingly.

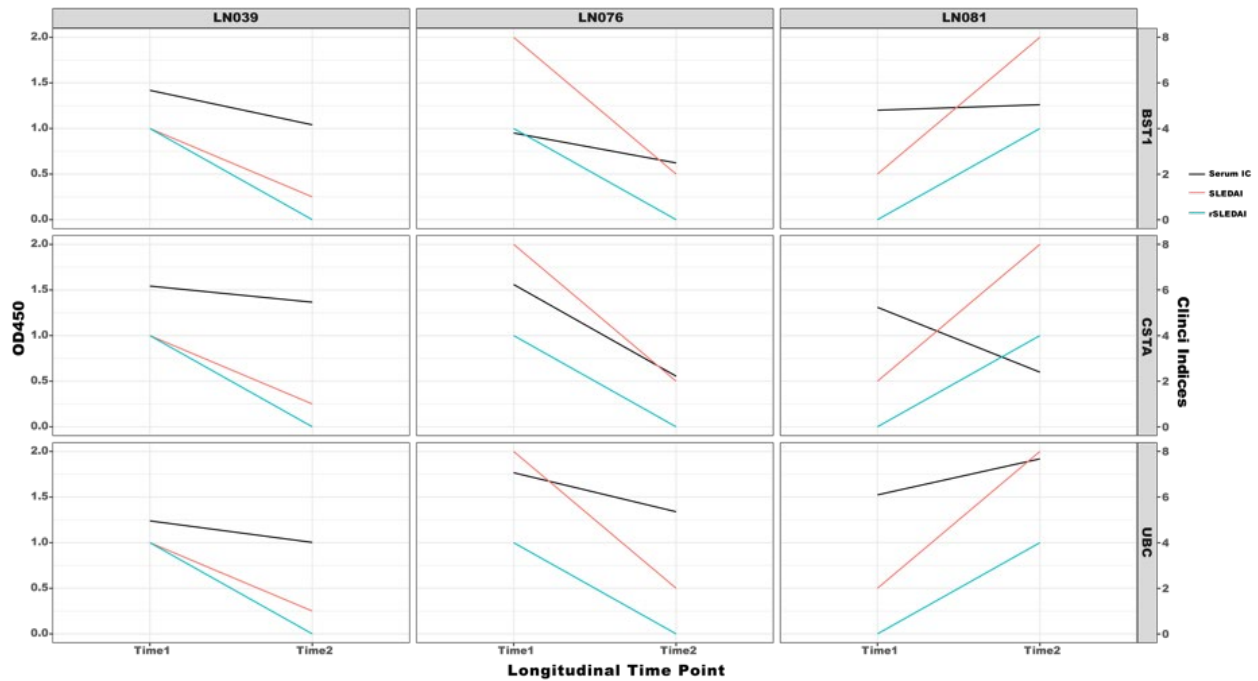

**Supplementary Figure 3. Longitudinal changes in serum ICx level and disease activity in LN.** Serum ICx levels (left, black) and clinic indices SLEDAI/rSLEDAI (right, red/blue) were serially monitored at two consecutive clinical visit in three LN patients. The interval between each visit was 6 months for patients LN039, LN076 and LN081.

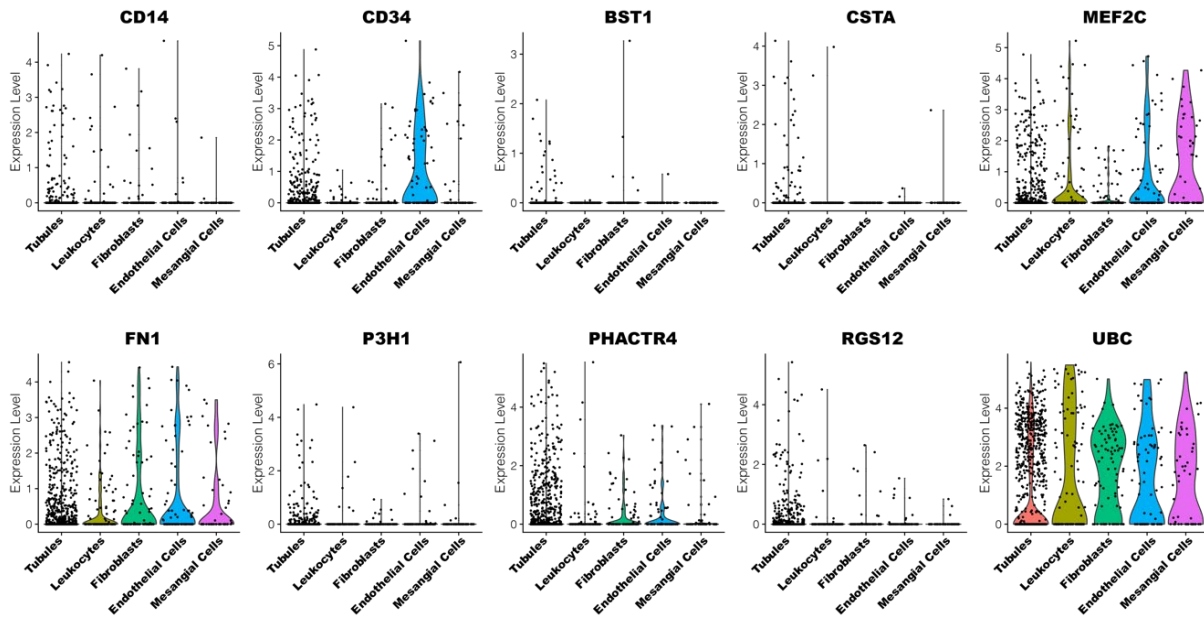

**Supplementary Figure 4. Kidney scRNA expression of autoantigen candidates in LN.**

Violin plot analysis of kidney scRNA expression in 6 cell types from 1496 LN patients were performed using raw data from a scRNA seq database [1].



## REFERENCES

1. Der E, Suryawanshi H, Morozov P, Kustagi M, Goilav B, Ranabothu S, et al. Tubular cell and keratinocyte single-cell transcriptomics applied to lupus nephritis reveal type I IFN and fibrosis relevant pathways. *Nature immunology*. 2019; 20(7):915-927.
2. Nehar-Belaid D, Hong S, Marches R, Chen G, Bolisetty M, Baisch J, et al. Mapping systemic lupus erythematosus heterogeneity at the single-cell level. *Nature immunology*. 2020; 21(9):1094-1106.
3. Yao M, Gao C, Zhang C, Di X, Liang W, Sun W, et al. Identification of molecular markers associated with the pathophysiology and treatment of lupus nephritis based on integrated transcriptome analysis. *Frontiers in Genetics*. 2020; 11.
4. Buang N, Tapeng L, Gray V, Sardini A, Whilding C, Lightstone L, et al. Type I interferons affect the metabolic fitness of CD8+ T cells from patients with systemic lupus erythematosus. *Nature communications*. 2021; 12(1):1-15.
5. Zhu H, Mi W, Luo H, Chen T, Liu S, Raman I, et al. Whole-genome transcription and DNA methylation analysis of peripheral blood mononuclear cells identified aberrant gene regulation pathways in systemic lupus erythematosus. *Arthritis research & therapy*. 2016; 18(1):1-17.
6. Berthier CC, Bethunaickan R, Gonzalez-Rivera T, Nair V, Ramanujam M, Zhang W, et al. Cross-species transcriptional network analysis defines shared inflammatory responses in murine and human lupus nephritis. *The Journal of Immunology*. 2012; 189(2):988-1001.
